# 1 **Efficient multiplex genome editing using CRISPR-Mb3Cas12a in mice**

2

3 Zhuqing Wang<sup>1,5</sup>, Yue Wang<sup>1,5</sup>, Shawn Wang<sup>1</sup>, Andrew J Gorzalski<sup>2</sup>, Hayden  
4 McSwiggin<sup>1</sup>, Tian Yu<sup>1</sup>, Kimberly Castaneda-Garcia<sup>1</sup>, Huili Zheng<sup>1</sup>, and Wei Yan<sup>1,3,4,\*</sup>

5

6 <sup>1</sup>Department of Physiology and Cell Biology, University of Nevada, Reno School of  
7 Medicine, Reno, NV 89557.

8 <sup>2</sup>Nevada State Public Health Laboratory, University of Nevada, Reno School of  
9 Medicine, Reno, NV 89557.

10 <sup>3</sup>Department of Obstetrics and Gynecology, University of Nevada, Reno School of  
11 Medicine, Reno, NV 89557.

12 <sup>4</sup>Department of Biology, University of Nevada, Reno, Reno, NV 89557.

13 <sup>5</sup>These authors contributed equally to this work.

14

15 *Keywords: Genome editing, CRISPR, Cas9, Cas12a, Cpf1, PAM*

16

17

18 \* Corresponding author:

19

20 Wei Yan M.D., Ph.D.

21 *University of Nevada, Reno Foundation Professor*

22 Department of Physiology and Cell Biology

23 University of Nevada School of Medicine

24 Center for Molecular Medicine, Room 207B

25 1664 North Virginia Street, MS/0575

26 Reno, NV 89557

27 Tel: 775 784 7765

28 Fax: 775 784 4362

29 Email: [wyan@med.unr.edu](mailto:wyan@med.unr.edu)

1 **Summary statement**

2 CRISPR-Mb3Cas12a can target a broader range of sequences in murine zygotes  
3 compared to AsCas12a and LbCas12a, and has lower on-target effects than Cas9 and  
4 high overall knock-in efficiency.

5

6 **Abstract**

7 Despite many advantages over Cas9, Cas12a has not been widely used in genome  
8 editing in mammalian cells largely due to its strict requirement of the TTTV protospacer  
9 adjacent motif (PAM) sequence. Here, we report that Mb3Cas12a (*Moraxella bovoculi*  
10 *AAX11\_00205*) could edit the genome in murine zygotes independent of TTTV PAM  
11 sequences and with minimal on-target mutations and close to 100% editing efficiency  
12 when crRNAs of 23nt spacers were used.

13

## 1 **Introduction**

2 The rapid advancement of CRISPR-Cas-based genome editing technologies has made  
3 gene therapy increasingly promising. However, several obstacles remain, including  
4 safety concerns due to both off-target and on-target mutations (Adikusuma et al., 2018;  
5 Fu et al., 2013; Hsu et al., 2013; Kosicki et al., 2018; Lee and Kim, 2018) and the  
6 requirement of proper PAM sequences for efficient and precise cleavage by the  
7 commonly used endonucleases (Komor et al., 2017), e.g., Cas9 and Cas12a/Cpf1. The  
8 Cas12a endonuclease has several advantages over Cas9. First, the most commonly  
9 used SpCas9 requires NGG PAM sequence, whereas the other widely used AsCas12a  
10 and LbCas12a utilize TTTV PAM sequences for efficient genome editing (Cong et al.,  
11 2013; Jinek et al., 2012; Wang et al., 2013; Zetsche et al., 2015). Second, Cas12a is  
12 guided by a single short CRISPR RNA (crRNA) and can efficiently process its own  
13 crRNAs, while Cas9 is directed by dual RNAs consisting of a crRNA and a tracrRNA,  
14 and rarely processes its own crRNAs (Cong et al., 2013; Fonfara et al., 2016; Jinek et  
15 al., 2012; Zetsche et al., 2017a). Third, Cas12a has much reduced off-target effects  
16 compared to SpCas9 due to its irreversible binding to the target region and strong  
17 discrimination against the off-target sequences (Kim et al., 2017; Kleinstiver et al., 2016;  
18 Strohkendl et al., 2018). Finally, Cas9 has been shown to cause on-target mutations  
19 including large deletions and insertions (Adikusuma et al., 2018; Kosicki et al., 2018;  
20 Lee and Kim, 2018), whereas Cas12a only generates staggered DNA overhangs, which  
21 may lead to much lower rate of on-target mutations due to the so-called preferred  
22 microhomology-mediated end joining (MMEJ) repair mechanism (Zetsche et al., 2015).  
23 However, practical applications of Cas12a have been severely hindered due, at least in  
24 part, to its strict requirement for the TTTV PAM sequence. Although the PAM sequence  
25 for FnCas12a has been shown to be YTV (Y stands for C/T and V for A/C/G), the actual  
26 editing efficiency of YTV PAM sequences in mammalian cells remains rather low (Tu et  
27 al., 2017; Zetsche et al., 2015). Inspired by a recent report suggesting that Mb3Cas12a  
28 edits HEK293 cells at a much higher efficiency through TTV PAM sequences compared  
29 to AsCas12a and LbCas12a (Zetsche et al., 2017b preprint), we explored whether  
30 Mb3Cas12a could be utilized for efficient genome editing and production of  
31 knockout/knock-in mice lines.

1

## 2 **Results and Discussion**

3 To determine whether Mb3Cas12a is active in mouse zygotes, we first used one crRNA  
4 harboring 20nt direct repeats with 20nt spacer recognizing the TTTV PAM sequence of  
5 *Prps111* (Table 1, Supplementary Fig. 1A, D), a testis-specific gene dispensable for  
6 spermatogenesis (Wang et al., 2018). One out of six founders obtained has an indel  
7 (insertion or deletion) (16.7%) (Table 1, Supplementary Fig. 1A, D), suggesting that  
8 Mb3Cas12a indeed works in mouse zygotes. Since AsCas12a and LbCas12a have the  
9 ability to process their own crRNAs (Fonfara et al., 2016; Zetsche et al., 2017a), we  
10 next tested whether Mb3Cas12a could do the same. We designed one crRNA  
11 harboring two 20nt spacers recognizing two TTTV PAM sequences at *Saraf* locus  
12 (Table 1, Supplementary Fig. 1B, E). The 20nt spacers were separated by 20nt direct  
13 repeats. One out of three founders was edited by spacer 1 (33.3%) (Table 1,  
14 Supplementary Fig. 1B, E), suggesting that Mb3Cas12a can indeed process its own  
15 crRNAs to edit a specific locus in mouse zygotes. We then determined whether  
16 Mb3Cas12a could utilize the TTV PAM sequence in mouse zygotes. We designed one  
17 crRNA harboring two 20nt spacers recognizing two TTV PAM sequences of the same  
18 *Saraf* locus (Table 1, Supplementary Fig. 1B, E). One out of four founders was edited  
19 with the spacer 2 (25%) (Table 1, Supplementary Fig. 1B, E), indicating that  
20 Mb3Cas12a can indeed target genomic DNA with TTV PAM sequences. Since the  
21 orientation of crRNAs has no significant effect on genome editing efficiency (Zetsche et  
22 al., 2017a), we compared the efficiency of Mb3Cas12a in editing DNA harboring TTTV  
23 and TTV PAM sequences by utilizing one single crRNA containing two spacers  
24 recognizing TTTV and TTV PAM sequences, respectively, in the *Mrv1* locus (Table 1,  
25 Supplementary Fig. 1C, F). Out of 5 founders, one was edited with the spacer  
26 recognizing the TTTV PAM sequence (20%), but none from the TTV PAM sequence  
27 (Table 1, Supplementary Fig. 1C, F), suggesting that Mb3Cas12a prefers the spacer  
28 targeting the TTTV PAM sequence.

29 As the length of crRNAs has been shown to affect the efficiency of Cas12a-  
30 mediated genome editing (Tu et al., 2017; Zetsche et al., 2015), we further tested  
31 whether the editing efficiency can be improved by optimizing the crRNA structure. We



1 first tested effects of the length of crRNAs on genome editing in *Dnmt1* locus in HEK293  
2 cells (Fig. 1A, B). No Mb3Cas12a activity was detected when a 17nt spacer was used,  
3 whereas the highest Mb3Cas12a activities comparable to AsCas12a and LbCas12a  
4 were observed in the crRNAs with 23nt spacer (Fig. 1B). Similar results have been  
5 reported for AsCas12a and LbCas12a, but not for FnCas12a, which appears to use  
6 21nt crRNAs more efficiently (Tu et al., 2017). To determine the potential effects of  
7 microinjection (cytoplasmic vs. pronuclear) methods on targeting efficiency, we injected  
8 Mb3Cas12a mRNA and one crRNA, harboring two spacers (one recognizing TTTV  
9 PAM sequence, and one TTV) targeting *Kcnj10* locus, into either cytoplasm only or both  
10 pronucleus and cytoplasm. Interestingly, the cytoplasmic injection appeared to have a  
11 higher targeting efficiency (77%, n=20) than the pronuclear and cytoplasmic injection  
12 (28.6%, n=39) (Table 1, Fig. 1C, D). Therefore, we used 23nt spacer and cytoplasmic  
13 microinjection to generate the following indels in mice (Fig. 2A).

14 To explore whether Mb3Cas12a could target multiple loci simultaneously, we  
15 used one crRNA harboring three 23nt spacers recognizing TTTV PAM sequencing  
16 targeting the *Prps* family, i.e. *Prps1*, *Prps2* and *Prps111*. Eleven founders obtained  
17 (100%) were edited by both the *Prps1* and *Prps111* crRNAs, whereas one (9.1%) was  
18 edited only by the *Prps2* crRNA (Table 1, Supplementary Fig. 2A), which may reflect a  
19 lower targeting efficiency of this particular crRNA. Next, we used a crRNA containing  
20 three 23nt spacers separated by 20nt direct repeats to target *miR-10b* (Table 1,  
21 Supplementary Fig. 2B, C). Two of the spacers (spacers 2 and 3) were designed to  
22 recognize a TTTV PAM sequence, whereas the other one targets a TTV PAM sequence  
23 (spacer 1) at *miR-10b* locus. All the five founders were edited by the two spacers  
24 targeting the TTTV PAM sequence (100%), and one of them was edited by the one  
25 recognizing the TTV PAM sequence (20%) (Table 1, Supplementary Fig. 2B, C). Similar  
26 results were also obtained when we used one crRNA containing one 23nt spacer  
27 targeting *miR-547* with a TTTV PAM sequence and two 23nt spacers targeting *miR-509*  
28 with one TTTV PAM and one TTV PAM. All six founders were edited by the two  
29 spacers targeting the TTTV PAM sequence (100%), and one of them was edited by the  
30 one recognizing the TTV PAM sequence (16.7%) (Table 1, Fig. 2B, C). Moreover,  
31 although the 23nt spacers recognizing TTTV PAM sequence often led to bi- or multi-

1 allelic targeting and TTV PAM sequence tended to yield mono-allelic targeting, the 20nt  
2 spacers appeared to cause mostly mono-allelic mutations (Table 1, Fig. 1D, 2C and  
3 Supplementary Fig. 1, 2). Recent reports have shown that Cas9 with one single gRNA  
4 tends to induce large indels in genomic DNA in mouse embryonic stem (ES) cells,  
5 progenitor cells and zygotes (Adikusuma et al., 2018; Kosicki et al., 2018), whereas  
6 Cas9 with two gRNAs causes large deletions within the two flanking gRNA-targeting  
7 sites (Wang et al., 2018). The incidences of large deletions induced by Cas9 with one  
8 single gRNA were 35.7%, 36.5%, and 45% in mouse ES cells, progenitor cells, and  
9 zygotes, respectively, whereas the incidence of large insertions was 26.3% in mouse  
10 ES cells (Adikusuma et al., 2018; Kosicki et al., 2018). Interestingly, unlike Cas9,  
11 Mb3Cpf-based genome editing predominantly generates indels, containing  
12 microhomology (MH) sequences flanking the cleavage sites with one or more spacers  
13 within a single crRNA. Among all 42 pups derived from Mb3Cas12a-based editing, only  
14 3 contained large insertions (7.1%) induced by 3 spacers in the crRNA, whereas the  
15 rest displayed different alleles with either two or more small mutations or one mutant  
16 plus one wild-type alleles (Table 1, Fig. 1D, 2C and Supplementary Fig. 1, 2). Based on  
17 RepeatMasker, two large insertions correspond to ERVL (endogenous retroviruses  
18 type-L) and ERVL-MaLR (mammalian apparent LTR retrotransposon), respectively,  
19 similar phenomenon has been observed in SpCas9 induced double strand breaks  
20 (DSBs) (Ono et al., 2015), suggesting these retrotransposons may hijack the DSBs  
21 induced by SpCas9 or Mb3Cas12a. None of the Mb3Cas12a-edited alleles contained  
22 large deletions, whereas they are commonly seen in Cas9-edited genes. These results  
23 suggest that MMEJ repair mechanism is preferentially adopted in fixing the staggered  
24 DNA ends, which may account for the minimal on-target effects in Mb3Cas12a-based  
25 genome editing.

26         Given that two-cell homologous recombination (2C-HR)-CRISPR, in which Cas9  
27 was tethered with monomeric streptavidin (mSA) that could bind to biotinylated DNA  
28 donor template, showed a higher knock-in (KI) efficiency (Gu et al., 2018), we tested  
29 whether Mb3Cas12a-mSA could do the same in generating KI mice (Fig. 3A, B). We  
30 microinjected 2-cell embryos with Mb3Cas12a-mSA mRNA, crRNA targeting *Slit2* locus,  
31 and biotinylated DNA donor template containing a BamHI restriction enzyme cutting site

1 (Fig. 3A). Among 5 founders, 2 (40%) have the knock-in alleles, indicating the  
2 Mb3Cas12a-mSA indeed can generate KI mice efficiently (Fig. 3B, 3C). During  
3 preparation of our manuscript, one study reporting that HkCas12a can target YTV and  
4 TYYN PAM sequences in human cell lines was published (Teng et al., 2019). However,  
5 it remains unknown whether HkCas12a works in murine zygotes and what its efficiency  
6 is. In summary, our data demonstrate that Mb3Cas12a can edit the murine genome  
7 independent of TTTV PAM sequence and with minimal on-target mutations and very  
8 high targeting efficiency. Mb3Cas12a-mediated genome editing expands the toolkit for  
9 efficient production of mutant mouse lines.

10

11

12

## 13 **Materials and Methods**

14

### 15 **Plasmids construction**

16 To prepare pcDNA3.1-Mb3Cas12a-mSA plasmid, monomeric streptavidin (mSA) DNA  
17 fragments amplified from PCS2+Cas9-mSA plasmid (Cat. 103882, Addgene,  
18 Watertown, MA) were inserted into the pY117 plasmid (pcDNA3.1-huMb3Cpf1) (Cat.  
19 92293, Addgene) *via* BamHI (Cat. R0136S, NEB, Ipswich, MA) and EcoRI (Cat.  
20 R3101S, NEB) restriction sites.

21 For the pUC-Slit2-BamHI plasmid, two homology arms (~1kb) flanking the  
22 crRNAs cutting sites of *Slit2* locus and pUC empty vector were amplified by Q5® Hot  
23 Start High-Fidelity 2X Master Mix (Cat. M0494S, NEB) from mouse tail genomic DNA  
24 and pX330 plasmid (Cat. 42230, Addgene), respectively. After purification with Ampure  
25 beads, these three DNA fragments were assembled with NEBuilder® HiFi DNA  
26 Assembly Master Mix (Cat. E2621L, NEB). BamHI restriction site was introduced  
27 between the two homology arms during the PCR amplification. The primers used for  
28 plasmids construction are listed in **Supplemental Table S1**.

29

### 30 **Generation of Mb3Cas12a and Mb3Cas12a-mSA mRNA, crRNAs, and donor DNA** 31 **template**

1 To synthesize Mb3Cas12a and Mb3Cas12a-mSA mRNAs, the pY117 plasmid  
2 (pcDNA3.1-huMb3Cpf1) (Cat. 92293, Addgene) and pcDNA3.1-Mb3Cas12a-mSA were  
3 digested with EcoR I (Cat. R3101S, NEB) overnight at 37°C, followed by purification  
4 with Ampure beads and mRNA synthesis with the HiScribe™ T7 ARCA mRNA Kit (Cat.  
5 E2065S, NEB). Then the *in vitro* transcribed mRNAs were treated with DNase I (NEB,  
6 Cat. M0303S) to remove the plasmid DNA template, followed by poly(A) tailing using E.  
7 coli poly(A) polymerase (Cat. M0276S, NEB). The poly(A)-tailed Mb3Cas12a mRNAs  
8 were purified using the RNA Clean & Concentrator™-5 (Cat. R1016, Zymo Research,  
9 Irvine, CA) and eluted in a Tris-EDTA solution (Cat.11-01-02-02, IDT, Coralville, IA).

10 crRNAs were designed using Benchling (<https://benchling.com/>). DNA oligos for  
11 making each crRNA were synthesized in the IDT Inc. and listed in **Supplemental Table**  
12 **S1**. To prepare crRNAs for microinjection, the T7 first strand primer and antisense  
13 oligos specific for each crRNA were mixed in 1X T4 DNA ligase buffer and heated to  
14 95°C for 5 minutes, and then allowed to cool down to room temperature on the bench.  
15 The annealed oligos were used as the templates for *in vitro* transcription (IVT) using the  
16 HiScribe™ T7 High Yield RNA Synthesis Kit (Cat. E2040S, NEB). After IVT, crRNAs  
17 were purified using the RNA Clean & Concentrator™-5 (Cat. R1016, Zymo Research)  
18 and eluted in Tris-EDTA solution (Cat.11-01-02-02, IDT).

19 To prepare crRNAs for transfection of HEK293 cells, PCR products  
20 corresponding to each crRNA were amplified with U6 forward primer and corresponding  
21 antisense oligos (as listed in **Supplemental Table S1**) from the pX330 plasmid (Cat.  
22 42230, Addgene). After digestion with DpnI (Cat. R0176S, NEB), the PCR products  
23 were purified using Ampure beads.

24 The biotinylated donor DNA template was amplified from the pUC-Slit2-BamHI  
25 plasmid with biotinylated primers (as listed in **Supplemental Table S1**), followed by  
26 DpnI digestion to remove the plasmid and purification with Ampure beads.

27

## 28 **HEK293 cells Transfection**

29 HEK293 cells were co-transfected with 400ng of pY117 (pcDNA3.1-huMb3Cpf1) (Cat.  
30 92293, Addgene) and 100ng of crRNA PCR product using Lipofectamine 2000 (Cat.

1 11668, Thermo Fisher Scientific, Waltham, MA) in a 24 well cell culture plate (Cat.  
2 3524, Corning, Corning, NY). After 48h, cells were collected for analyses.

3

#### 4 **Animal use and generation of knockout (KO) and knock-in (KI) mice**

5 The animal protocol for this study was approved by the Institutional Animal Care and  
6 Use Committee (IACUC) of the University of Nevada, Reno (protocol number 00494).  
7 All mice were housed and maintained under specific pathogen free conditions with a  
8 temperature- and humidity-controlled animal facility in the Department of Lab Animal  
9 Medicine, University of Nevada, Reno. Generation of KO and KI mice were performed  
10 as previously described with modifications (Gu et al., 2018; Wang et al., 2018; Wang et  
11 al., 2019). Briefly, 4-6 weeks of FVB/NJ or C57BL/6J female mice were super-ovulated  
12 and mated with C57BL/6J stud males; zygotes and 2-cell stage embryos were collected  
13 from the oviducts for KO and KI, respectively. For KO, Mb3Cas12a mRNA (200ng/μl)  
14 and crRNA (100 ng/μl) were mixed and injected into the cytoplasm or pronucleus of the  
15 zygotes in M2 medium (Cat. MR-051-F, Millipore, Burlington, MA). For KI, Mb3Cas12a-  
16 mSA mRNA (75ng/μl), crRNA (50 ng/μl) and biotinylated donor DNA template (20ng/μl)  
17 were mixed and injected into the cytoplasm or pronucleus of the 2-cell embryos in M2  
18 medium. After injection, all embryos were cultured for 1h in KSOM+AA medium (Cat.  
19 MR-121-D, Millipore) at 37°C under 5% CO<sub>2</sub> in air before being transferred into 7-10  
20 week-old female CD1 recipients.

21

#### 22 **Mouse genotyping, T7EI and Sanger sequencing**

23 Mouse genotyping was performed as previously described (Wang et al., 2018; Wang et  
24 al., 2019). Briefly, mouse tail or ear snips were lysed in a lysis buffer (40mM NaOH,  
25 0.2mM EDTA) for 1h at 95°C, followed by neutralization using the same volume of  
26 neutralizing buffer (40mM Tris-HCl). PCR reactions were conducted using Platinum™  
27 SuperFi™ Green PCR Master Mix (Cat. 12359010, Thermo Fisher Scientific). T7EI  
28 (Cat. M0302L, NEB) assay was followed to detect the mutations. The positive samples  
29 were proceeded with A tailing using GoTaq® Green Master Mix (Cat. M7123, Promega,  
30 Madison, WI) for 5min at 95 °C, followed by 15min at 72 °C. The A-tailed PCR products  
31 were then ligated to pGEM®-T Easy Vector using pGEM®-T Easy Vector Systems (Cat.

1 A1360, Promega). Positive colonies were selected for Sanger sequencing. Data was  
2 analyzed using Geneious software. The primers used for genotyping are listed in  
3 **Supplemental Table S1.**

#### 4 5 **MiSeq library construction and analysis**

6 DNA fragment of *Prps1*, *Prps2*, and *Prps111* were amplified using Platinum™ SuperFi™  
7 Green PCR Master Mix (Cat. 12359010, Thermo Fisher Scientific) from lysis of mouse  
8 tail or ear snips. The PCR products were then tagged using Nextera XT DNA Library  
9 Preparation Kit (Cat. 15032354, Illumina, San Diego, CA) and indexed using Nextera  
10 XT Index Kit (Cat. 15055294, Illumina). DNA library was sequenced using MiSeq  
11 Reagent Kit v2 (500-cycles) (Cat. MS-102-2003, Illumina). Data was analyzed using  
12 Geneious software. The primers used for *Prps1*, *Prps2*, and *Prps111* are listed in  
13 **Supplemental Table S1.**

#### 14 15 **Acknowledgements**

16 Not applicable.

#### 17 18 **Competing interests**

19 No competing interests declared.

#### 20 21 **Funding**

22 This work was supported by grants from the National Institutes of Health (HD071736,  
23 HD085506, and P30GM110767 to WY) and John Templeton Foundation (PID: 61174 to  
24 WY).

#### 25 26 **Data availability**

27 The datasets generated and/or analyzed during the current study are available in the  
28 Sequence Read Archive (SRA), <https://www.ncbi.nlm.nih.gov/sra/PRJNA556550>

#### 29 30 **Authors' contributions**

1 Z. W. and W. Y. conceived and designed the research. Z. W., Y. W., S. W., A. J G., H.  
2 M., T. Y., K. C-G., and H.Z. performed bench experiments. Z. W. analyzed data. Z. W.  
3 and W. Y. wrote the manuscript. All reviewed and agreed with the contents of the  
4 manuscript.  
5



1 **Reference:**

- 2 **Adikusuma, F., Piltz, S., Corbett, M. A., Turvey, M., McColl, S. R., Helbig, K. J.,**  
3 **Beard, M. R., Hughes, J., Pomerantz, R. T. and Thomas, P. Q.** (2018). Large  
4 deletions induced by Cas9 cleavage. *Nature* **560**, E8-E9.
- 5 **Cong, L., Ran, F. A., Cox, D., Lin, S. L., Barretto, R., Habib, N., Hsu, P. D., Wu, X.**  
6 **B., Jiang, W. Y., Marraffini, L. A., et al.** (2013). Multiplex Genome Engineering  
7 Using CRISPR/Cas Systems. *Science* **339**, 819-823.
- 8 **Fonfara, I., Richter, H., Bratovic, M., Le Rhun, A. and Charpentier, E.** (2016). The  
9 CRISPR-associated DNA-cleaving enzyme Cpf1 also processes precursor  
10 CRISPR RNA. *Nature* **532**, 517-521.
- 11 **Fu, Y., Foden, J. A., Khayter, C., Maeder, M. L., Reyon, D., Joung, J. K. and**  
12 **Sander, J. D.** (2013). High-frequency off-target mutagenesis induced by  
13 CRISPR-Cas nucleases in human cells. *Nat Biotechnol* **31**, 822-826.
- 14 **Gu, B., Posfai, E. and Rossant, J.** (2018). Efficient generation of targeted large  
15 insertions by microinjection into two-cell-stage mouse embryos. *Nat Biotechnol*  
16 **36**, 632-637.
- 17 **Hsu, P. D., Scott, D. A., Weinstein, J. A., Ran, F. A., Konermann, S., Agarwala, V.,**  
18 **Li, Y., Fine, E. J., Wu, X., Shalem, O., et al.** (2013). DNA targeting specificity of  
19 RNA-guided Cas9 nucleases. *Nat Biotechnol* **31**, 827-832.
- 20 **Jinek, M., Chylinski, K., Fonfara, I., Hauer, M., Doudna, J. A. and Charpentier, E.**  
21 (2012). A Programmable Dual-RNA-Guided DNA Endonuclease in Adaptive  
22 Bacterial Immunity. *Science* **337**, 816-821.
- 23 **Kim, H. K., Song, M., Lee, J., Menon, A. V., Jung, S., Kang, Y. M., Choi, J. W., Woo,**  
24 **E., Koh, H. C., Nam, J. W., et al.** (2017). In vivo high-throughput profiling of  
25 CRISPR-Cpf1 activity. *Nat Methods* **14**, 153-159.
- 26 **Kleinstiver, B. P., Tsai, S. Q., Prew, M. S., Nguyen, N. T., Welch, M. M., Lopez, J.**  
27 **M., McCaw, Z. R., Aryee, M. J. and Joung, J. K.** (2016). Genome-wide  
28 specificities of CRISPR-Cas Cpf1 nucleases in human cells. *Nat Biotechnol* **34**,  
29 869-874.
- 30 **Komor, A. C., Badran, A. H. and Liu, D. R.** (2017). CRISPR-Based Technologies for  
31 the Manipulation of Eukaryotic Genomes. *Cell* **169**, 559.



- 1 **Kosicki, M., Tomberg, K. and Bradley, A.** (2018). Repair of double-strand breaks  
2 induced by CRISPR-Cas9 leads to large deletions and complex rearrangements.  
3 *Nat Biotechnol* **36**, 765-771.
- 4 **Lee, H. and Kim, J. S.** (2018). Unexpected CRISPR on-target effects. *Nat Biotechnol*  
5 **36**, 703-704.
- 6 **Ono, R., Ishii, M., Fujihara, Y., Kitazawa, M., Usami, T., Kaneko-Ishino, T., Kanno,**  
7 **J., Ikawa, M. and Ishino, F.** (2015). Double strand break repair by capture of  
8 retrotransposon sequences and reverse-transcribed spliced mRNA sequences in  
9 mouse zygotes. *Scientific reports* **5**, 12281.
- 10 **Strohkendl, I., Saifuddin, F. A., Rybarski, J. R., Finkelstein, I. J. and Russell, R.**  
11 (2018). Kinetic Basis for DNA Target Specificity of CRISPR-Cas12a. *Mol Cell*.
- 12 **Teng, F., Li, J., Cui, T., Xu, K., Guo, L., Gao, Q., Feng, G., Chen, C., Han, D., Zhou,**  
13 **Q., et al.** (2019). Enhanced mammalian genome editing by new Cas12a  
14 orthologs with optimized crRNA scaffolds. *Genome Biol* **20**, 15.
- 15 **Tu, M., Lin, L., Cheng, Y., He, X., Sun, H., Xie, H., Fu, J., Liu, C., Li, J., Chen, D., et**  
16 **al.** (2017). A 'new lease of life': FnCpf1 possesses DNA cleavage activity for  
17 genome editing in human cells. *Nucleic acids research* **45**, 11295-11304.
- 18 **Wang, H., Yang, H., Shivalila, C. S., Dawlaty, M. M., Cheng, A. W., Zhang, F. and**  
19 **Jaenisch, R.** (2013). One-step generation of mice carrying mutations in multiple  
20 genes by CRISPR/Cas-mediated genome engineering. *Cell* **153**, 910-918.
- 21 **Wang, Z., Lee, S., Oliver, D., Yuan, S., Tang, C., Wang, Y., Zheng, H. and Yan, W.**  
22 (2018). Prps111, a testis-specific gene, is dispensable for mouse  
23 spermatogenesis. *Mol Reprod Dev* **85**, 802-804.
- 24 **Wang, Z., McSwiggin, H., Newkirk, S. J., Wang, Y., Oliver, D., Tang, C., Lee, S.,**  
25 **Wang, S., Yuan, S., Zheng, H., et al.** (2019). Insertion of a chimeric  
26 retrotransposon sequence in mouse Axin1 locus causes metastable kinky tail  
27 phenotype. *Mobile DNA* **10**, 17.
- 28 **Zetsche, B., Gootenberg, J. S., Abudayyeh, O. O., Slaymaker, I. M., Makarova, K.**  
29 **S., Essletzbichler, P., Volz, S. E., Joung, J., van der Oost, J., Regev, A., et**  
30 **al.** (2015). Cpf1 Is a Single RNA-Guided Endonuclease of a Class 2 CRISPR-  
31 Cas System. *Cell* **163**, 759-771.

- 1 **Zetsche, B., Heidenreich, M., Mohanraju, P., Fedorova, I., Kneppers, J.,**
- 2 **DeGennaro, E. M., Winblad, N., Choudhury, S. R., Abudayyeh, O. O.,**
- 3 **Gootenberg, J. S., et al. (2017a).** Multiplex gene editing by CRISPR-Cpf1 using
- 4 a single crRNA array. *Nat Biotechnol* **35**, 31-34.
- 5 **Zetsche, B., Strecker, J., Abudayyeh, O. O., Gootenberg, J. S., Scott, D. A. and**
- 6 **Zhang, F. (2017b).** A Survey of Genome Editing Activity for 16 Cpf1 orthologs.
- 7 *bioRxiv*
- 8

1 **Figure 1. Optimization of Mb3Cas12a-based genome editing efficiency by**  
2 **adjusting the crRNA length and microinjection sites.**

3 A. Sequences of crRNAs targeting *Dnmt1* locus. crRNAs with one 20nt direct repeat  
4 and spacers of various lengths recognizing TTTV PAM sequences were used for  
5 targeting *Dnmt1* in HEK293 cells. B. T7EI assay results of Mb3Cas12a-edited *Dnmt1*  
6 locus in HEK293 cells. C. PCR and PCR-T7EI to identify the efficiency of Mb3Cas12a-  
7 based genome editing in *Kcnj10* locus by either pronuclear and cytoplasmic  
8 microinjection or cytoplasmic microinjection only in murine zygotes. D. crRNAs used in  
9 targeting *Kcnj10* locus (upper panel) and Sanger sequencing results of Mb3Cas12a-  
10 based genome editing in *Kcnj10* locus in murine zygotes (lower panel). Red underlines  
11 represent microhomology (MH) sequences.

12

13 **Figure 2. Multiplex targeting efficiency of Mb3Cas12a in *miR-547* & *miR-509* loci**  
14 **with TTV PAM sequence in mice.**

15 A. Schematics showing the strategy used for generating indels in mouse zygotes.  
16 Mb3Cas12a mRNA and 23nt crRNA are microinjected into the cytoplasm of mouse  
17 zygotes. B. PCR genotyping results of Mb3Cas12a-edited *miR-547* & *miR-509*  
18 founders. One crRNA with one 23nt spacer targeting *miR-547* with a TTTV PAM  
19 sequence and two 23nt spacers targeting *miR-509* with one TTTV PAM and one TTV  
20 PAM sequences was used to target *miR-547* & *miR-509* loci. C. Sanger sequencing  
21 results of Mb3Cas12a-edited pups #1, #2, #3, #4, #5 and #6 in *miR-547* & *miR-509* loci.  
22 Red underlines represent microhomology (MH) sequences, characters in grey  
23 background indicate large insertions.

24

25 **Figure. 3 Generation of knock-in (KI) in *Slit2* locus using Mb3Cas12a-mSA in**  
26 **mouse 2-cell embryos.**

27 A. Schematics showing the strategy used for generating KI in 2-cell mouse embryos.  
28 Mb3Cas12a mRNA, crRNA and biotinylated donor DNA template are microinjected into  
29 2-cell mouse embryos. B. Efficiency of Mb3Cas12a-mSA-mediated KI in *Slit2* locus in  
30 mice. One crRNA harboring two 23nt spacers recognizing one TTTV PAM and one  
31 TTV PAM sequence was used to target *Slit2* locus. Upper panel, strategy used for

1 generating *Slit2-BamHI* KI. Colored characters represent DNA sequence, black  
2 characters in colored background indicate corresponding amino acids. Lower panel,  
3 PCR, PCR-T7EI (T7 endonuclease I assay) and PCR-BamHI digestion show the KI  
4 efficiency. C. Sanger sequencing results of Mb3Cas12a-mSA-mediated KI pups #2, and  
5 #4 in *Slit2* locus.

6

7 **Supplementary Figure 1. Efficiency of Mb3Cas12a-based genome editing using**  
8 **20nt spacers targeting *Prps111*, *Saraf* and *Mrv1* loci in mice.**

9 A. T7 endonuclease I (T7EI) assay results of Mb3Cas12a-edited *Prps111* locus. One  
10 crRNA with one 20nt direct repeat and one 20nt spacer recognizing a TTTV PAM  
11 sequence was used for targeting *Prps111*. B. T7EI assay results of Mb3Cas12a-edited  
12 *Saraf* locus. Two crRNAs harboring two 20nt spacers either recognizing two TTTV or  
13 two TTV PAM sequences were used to target *Saraf* locus. The expected bands  
14 corresponding to the pups after T7EI assays are indicated with the same color. C. T7EI  
15 assay results of Mb3Cas12a-edited *Mrv1* locus. One single crRNA containing two  
16 spacers recognizing both TTTV and TTV PAM sequences was used to target *Mrv1*  
17 locus. D. Sanger sequencing results of Mb3Cas12a-edited pup #23 in *Prps111* locus. E.  
18 Sanger sequencing results of Mb3Cas12a-edited pups #15 and #21 in *Saraf* locus. F.  
19 Sanger sequencing results of Mb3Cas12a-edited pup #16 in *Mrv1* locus. Red  
20 underlines represent microhomology (MH) sequences.

21

22 **Supplementary Figure 2. Multiplex targeting efficiency of Mb3Cas12a in *Prps***

23 **family and *miR-10b* loci in mice.** A. MiSeq results of Mb3Cas12a targeting efficiency  
24 in *Prps1*, *Prps2*, and *Prps111* with one crRNA, which contains three 20nt direct repeats  
25 and three 23nt spacers targeting *Prps1*, *Prps2* and *Prps111* with TTTV PAM sequences.  
26 Red underlines represent microhomology (MH) sequences. B. PCR genotyping results  
27 of Mb3Cas12a-edited *miR-10b* founders. One crRNA with three 20nt direct repeats and  
28 three 23nt spacers recognizing two TTTV PAM and one TTV PAM sequences was used  
29 to target *miR-10b* locus. C. Sanger sequencing results of Mb3Cas12a-edited pups #1,  
30 #2, #3, #4 and #5 in *miR-10b* locus.

## Figure 1

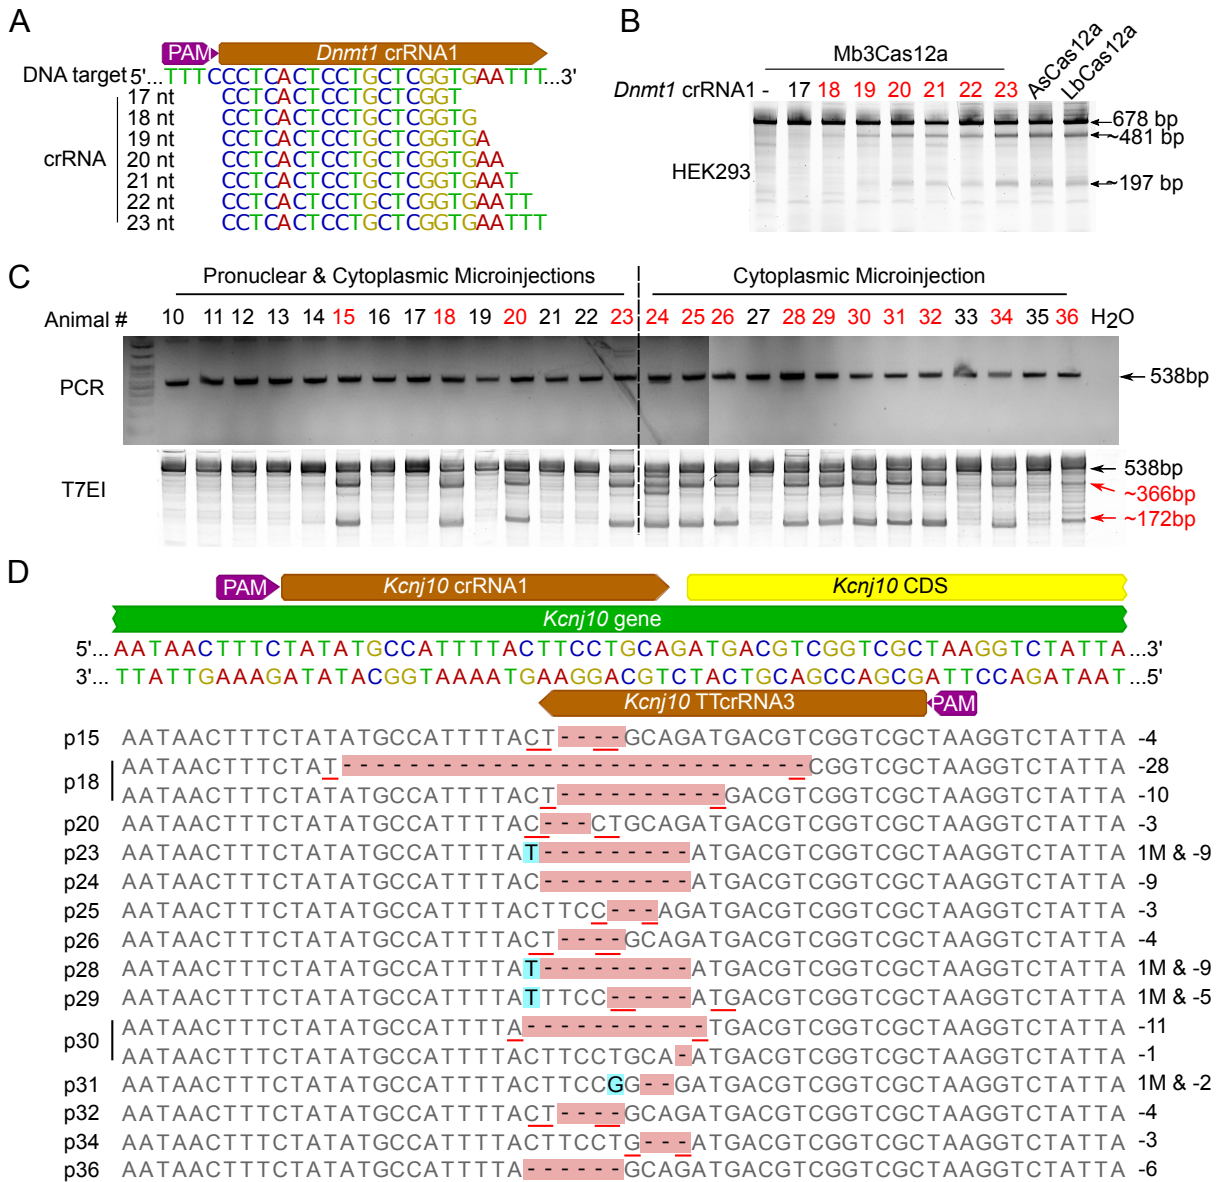

Figure 2

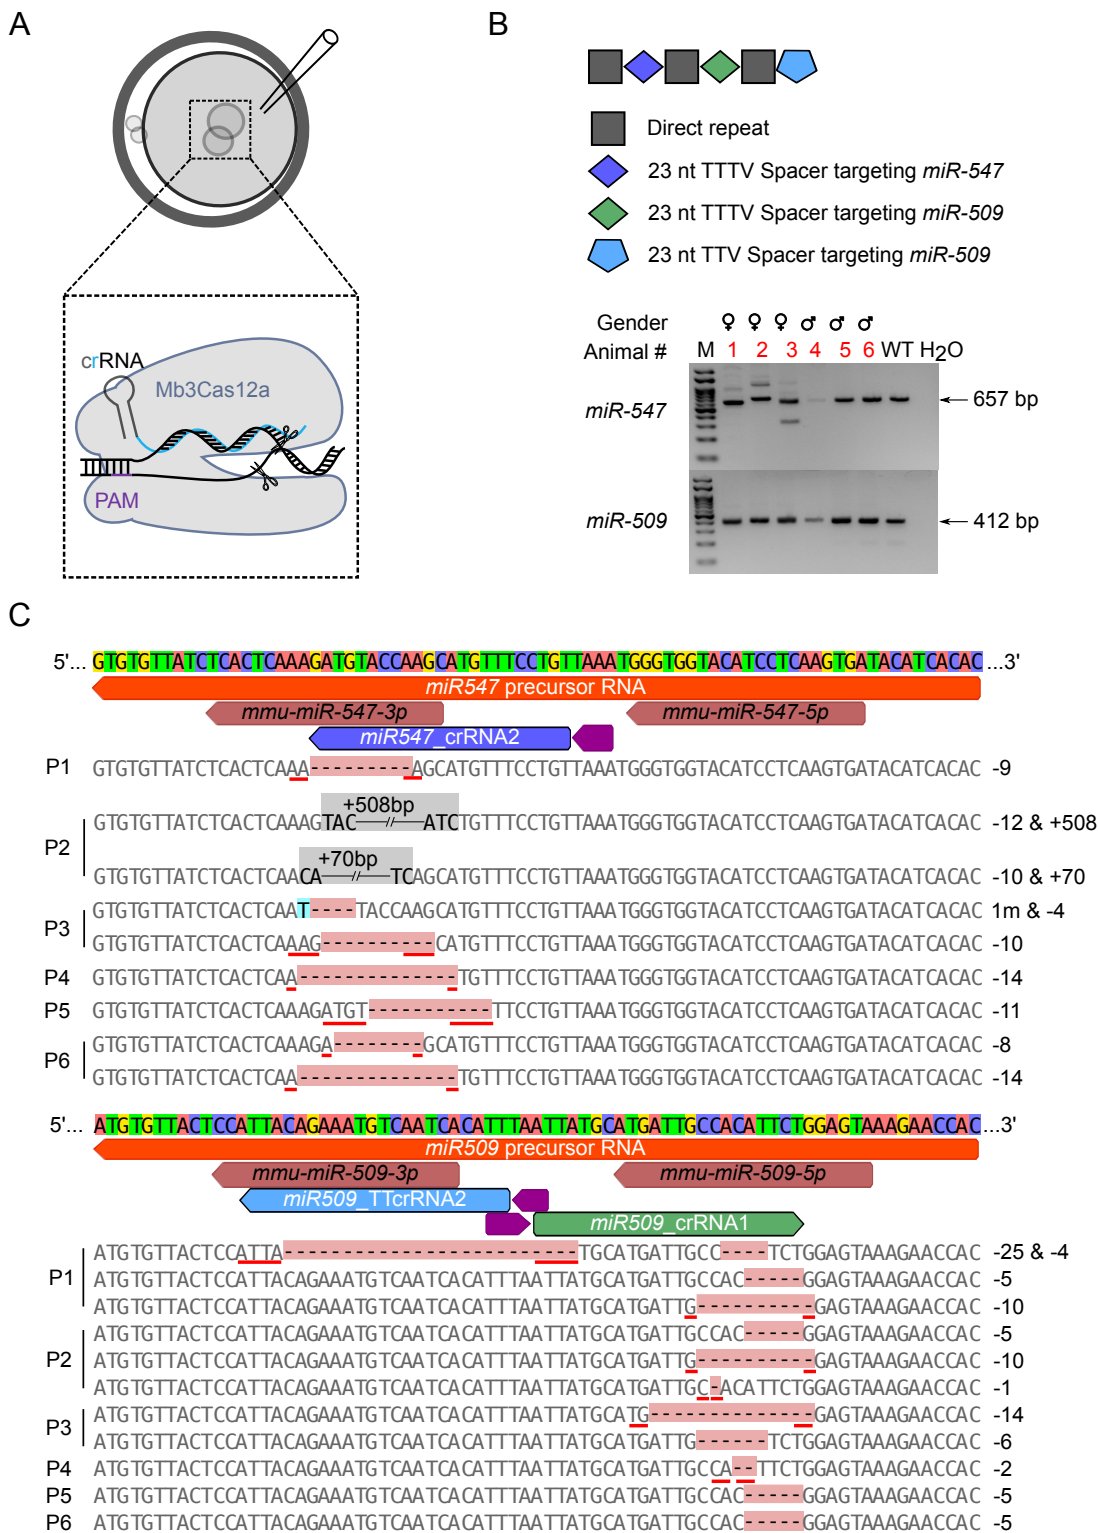

Figure 3

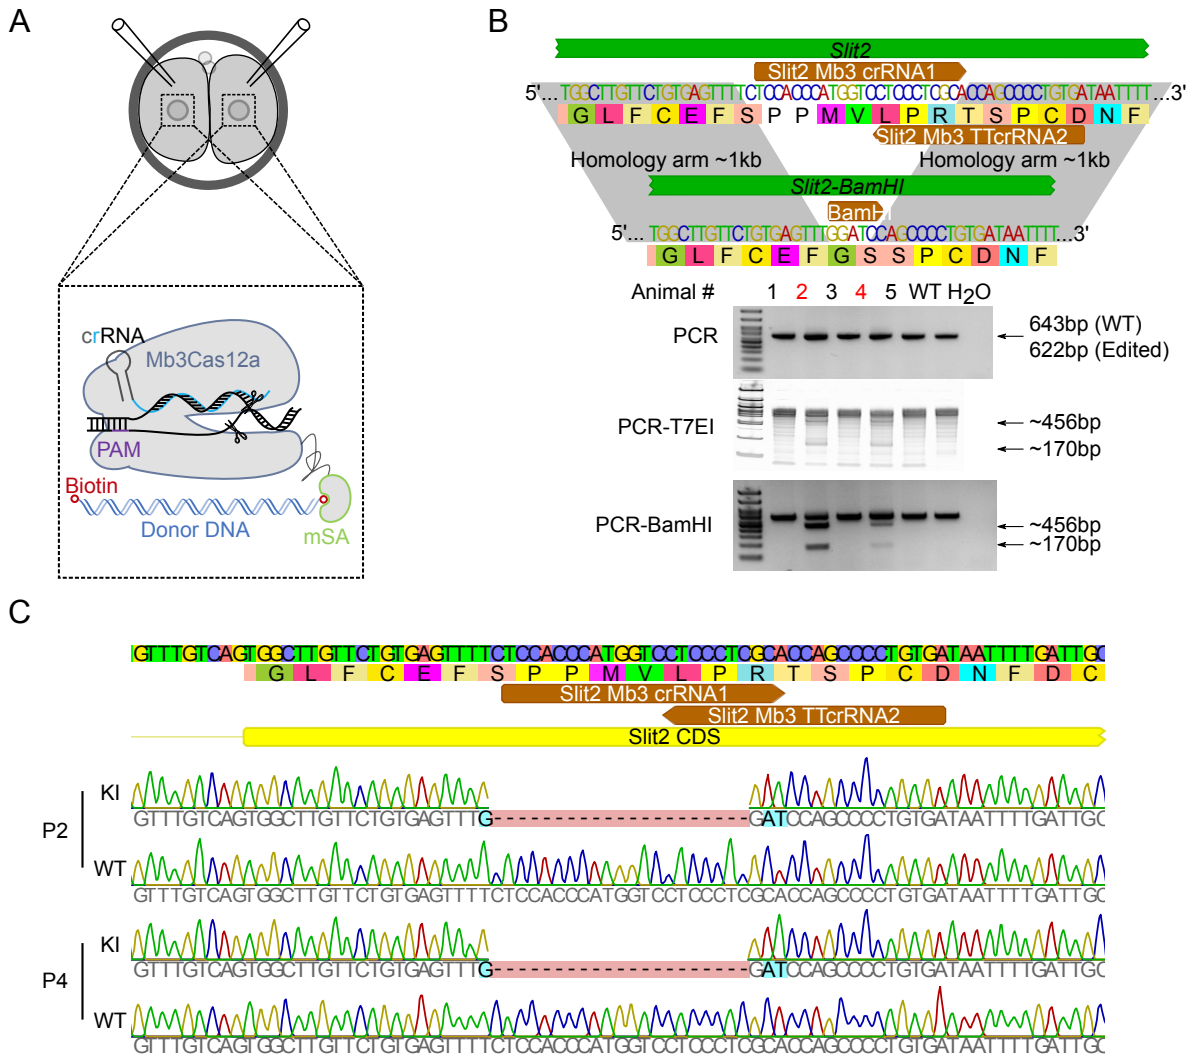

**Table 1. Editing efficiency of Mb3Cpf1 in murine zygotes.**

| Target genes                          | Length of spacer | #spacer in the cRNA used | PAM sequence                              | Site of microinjection                                |
|---------------------------------------|------------------|--------------------------|-------------------------------------------|-------------------------------------------------------|
| <i>Prps11</i>                         |                  | 1                        | TTTV (Spacer 1)                           |                                                       |
| <i>Saraf</i>                          | 20nt             | 2                        | TTTV (Spacer 1)                           | Cytoplasm (Zygote)                                    |
|                                       |                  |                          | TTTV (Spacer 2)                           |                                                       |
|                                       |                  | 2                        | TTV (Spacer 1)                            |                                                       |
|                                       |                  |                          | TTV (Spacer 2)                            |                                                       |
| <i>Mrvi1</i>                          |                  | 2                        | TTTV (Spacer 1)<br>TTV (Spacer 2)         |                                                       |
| <i>Kcnj10</i>                         |                  | 2                        | TTTV (Spacer 1) & TTV (Spacer 2)          | Pronucleus & Cytoplasm (Zygote)<br>Cytoplasm (Zygote) |
| <i>miR-10b</i>                        |                  | 3                        | TTV (Spacer 1)                            |                                                       |
|                                       |                  |                          | TTTV (Spacer 2)                           |                                                       |
|                                       |                  |                          | TTTV (Spacer 3)                           |                                                       |
| <i>Prps1 &amp; Prps2 &amp; Prps11</i> | 23nt             | 1                        | TTTV (Spacer 1 targeting <i>Prps1</i> )   | Cytoplasm (Zygote)                                    |
|                                       |                  | 1                        | TTTV (Spacer 2 targeting <i>Prps2</i> )   |                                                       |
|                                       |                  | 1                        | TTTV (Spacer 3 targeting <i>Prps11</i> )  |                                                       |
| <i>miR-547 &amp; miR-509</i>          |                  | 3                        | TTTV (Spacer 1 targeting <i>miR-547</i> ) |                                                       |
|                                       |                  |                          | TTTV (Spacer 2 targeting <i>miR-509</i> ) |                                                       |
|                                       |                  |                          | TTV (Spacer 3 targeting <i>miR-509</i> )  |                                                       |
| <i>Slit2</i>                          |                  | 2                        | TTTV (Spacer 1)                           | 2-cell                                                |
|                                       |                  |                          | TTV (Spacer 2)                            |                                                       |

<sup>a</sup>: (#Newborns/#Zygotes injected and transferred)\*%

<sup>b</sup>: (#Mutants/#Newborns)\*%



| #Zygotes injected and transferred | #Newborns (birth rate) <sup>a</sup> | #Mutants (targeting efficiency) <sup>b</sup> | Indel/Knock-in (KI) | Mono-allelic mutation | Bi-allelic mutation | Multi-allelic mutation |
|-----------------------------------|-------------------------------------|----------------------------------------------|---------------------|-----------------------|---------------------|------------------------|
| 22                                | 6(27.3%)                            | 1(16.7%)                                     |                     | Y                     | N                   | N                      |
| 22                                | 3(13.6%)                            | 1(33.3%)                                     |                     | Y                     | N                   | N                      |
|                                   |                                     | 0(0%)                                        |                     | N                     | N                   | N                      |
| 21                                | 4(19%)                              | 0(0%)                                        |                     | N                     | N                   | N                      |
|                                   |                                     | 1(25%)                                       |                     | Y                     | N                   | N                      |
| 23                                | 6(26.1%)                            | 1(16.7%)                                     |                     | Y                     | N                   | N                      |
|                                   |                                     | 0(0%)                                        |                     | N                     | N                   | N                      |
| 39                                | 14 (35.9%)                          | 4 (28.6%)                                    |                     | Y                     | Y                   | N                      |
| 20                                | 13 (65%)                            | 10 (77%)                                     | Indel               | Y                     | N                   | N                      |
|                                   |                                     | 1(20%)                                       |                     | Y                     | N                   | N                      |
| 12                                | 5(41.7%)                            | 5 (100%)                                     |                     | N                     | Y                   | N                      |
|                                   |                                     | 5 (100%)                                     |                     | N                     | Y                   | N                      |
|                                   |                                     | 11(100%)                                     |                     | N                     | Y                   | Y                      |
| 30                                | 11 (36.7%)                          | 1 (9.1%)                                     |                     | N                     | Y                   | Y                      |
|                                   |                                     | 11 (100%)                                    |                     | Y                     | N                   | N                      |
|                                   |                                     | 6 (100%)                                     |                     | N                     | Y                   | Y                      |
| 38                                | 6 (15.8%)                           | 6 (100%)                                     |                     | N                     | Y                   | Y                      |
|                                   |                                     | 1 (16.7%)                                    |                     | Y                     | N                   | N                      |
| 23                                | 5(21.7%)                            | 2 (40%)                                      | KI                  |                       | N/A                 |                        |

Figure S1

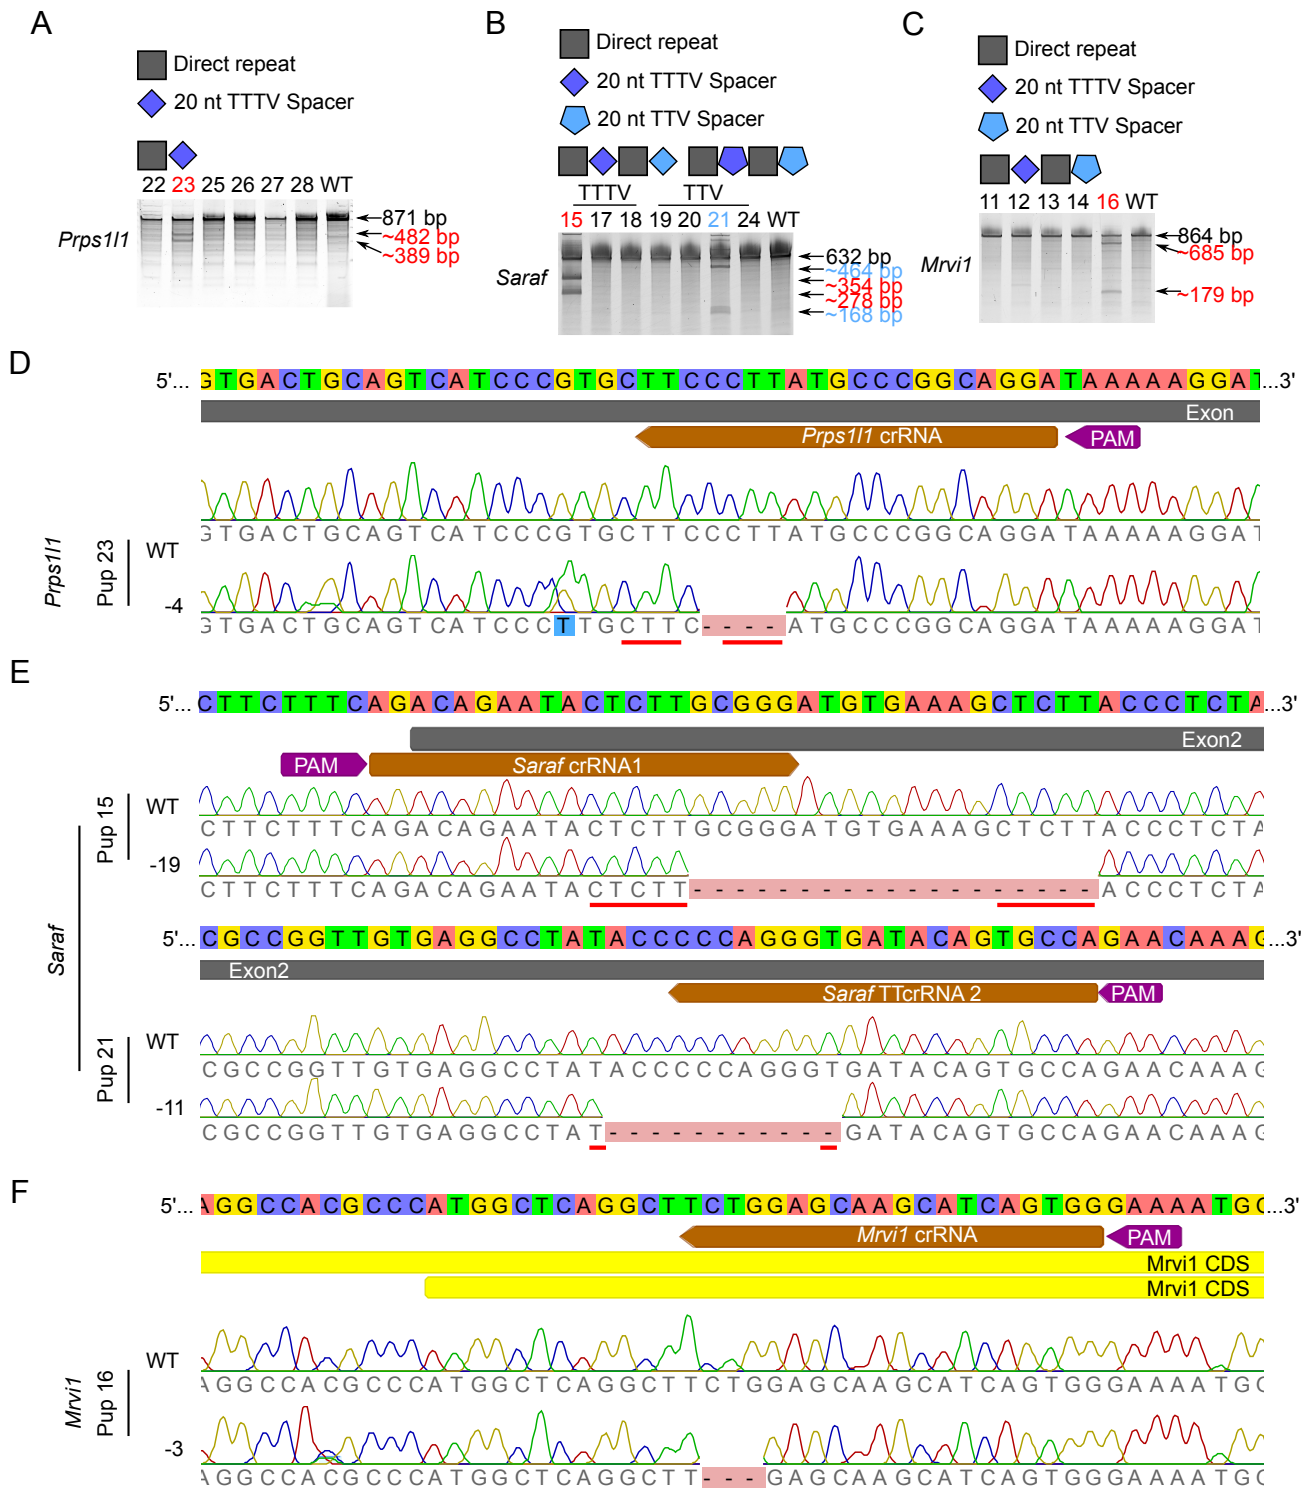

Figure S2

bioRxiv preprint doi: <https://doi.org/10.1101/731646>; this version posted August 10, 2019. The copyright holder for this preprint (which was not certified by peer review) is the author/funder, who has granted bioRxiv a license to display the preprint in perpetuity. It is made available under aCC-BY-NC-ND 4.0 International license.

A

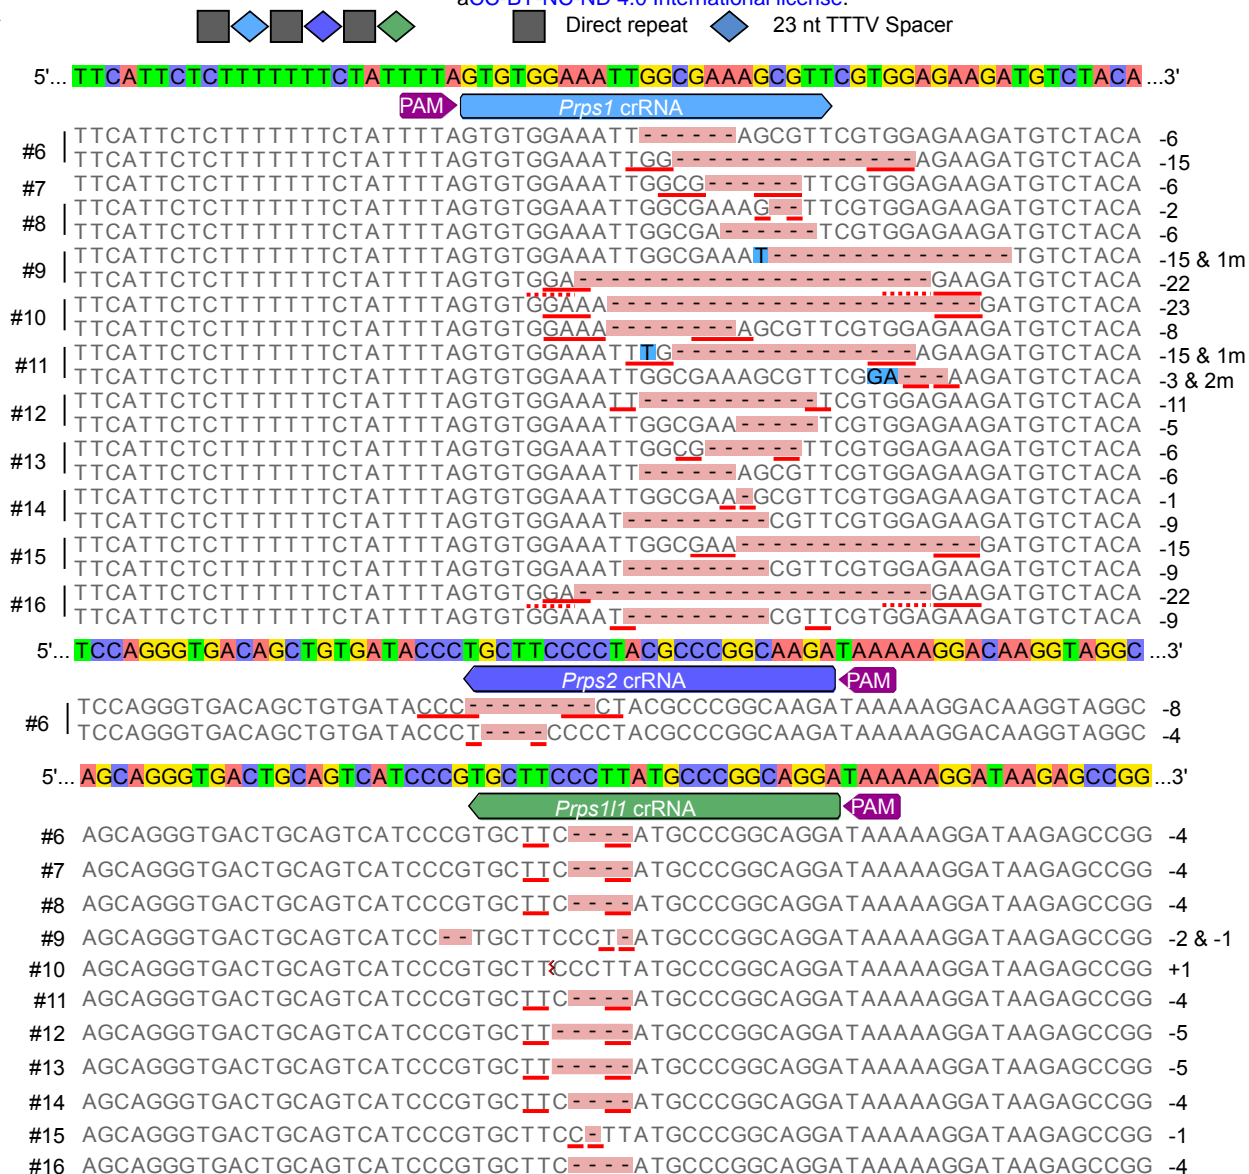

B

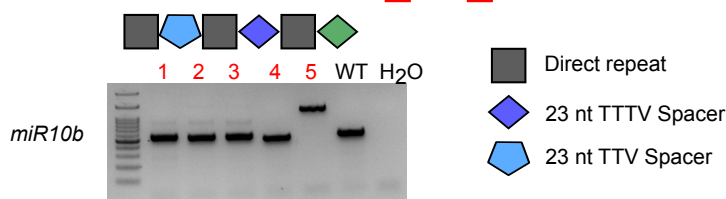

C

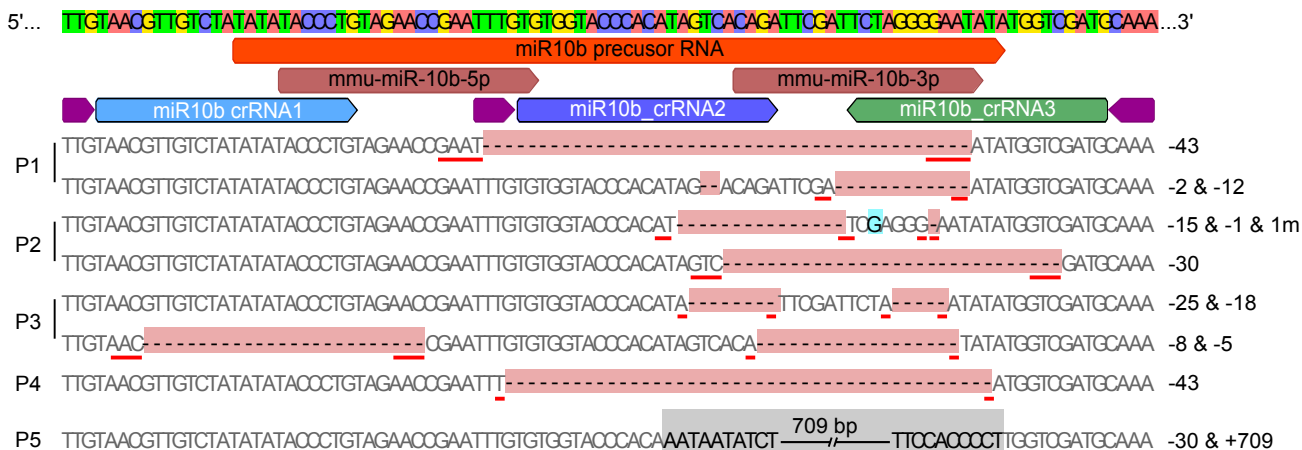

| Name                      | Sequence                                                                                                                                                                                                    | Usage                           |
|---------------------------|-------------------------------------------------------------------------------------------------------------------------------------------------------------------------------------------------------------|---------------------------------|
| T7 Top stand primer       | GAAATTAATACGACTCACTATAGGG<br>TTCCCTTATGCCCGGCAGGAATCTACA                                                                                                                                                    | In vitro transcription of crRNA |
| T7 Mb3 Prps111 R          | AACAGTAGAAATTCCCTATAGTGAGT<br>CGTATTAATTTTC<br>GTGCGCATGCAGAAGCTGACATCTAC<br>AAACAGTAGAAATTTCTGGAGCAAGC                                                                                                     | In vitro transcription of crRNA |
| T7 Mb3 Mrv1 cr(+TT) R     | ATCAGTGGATCTACAAACAGTAGAAA<br>TTCCCTATAGTGAGTCGTATTAATTTTC<br>AGGGTGATACAGTGCCAGAAATCTAC<br>AAACAGTAGAAATTCCCGCAAGAGTA<br>TTCTGTCTATCTACAAACAGTAGAAAT                                                       | In vitro transcription of crRNA |
| T7 Mb3 Saraf 2cr R        | TCCCTATAGTGAGTCGTATTAATTTTC<br>CCCAGGGTGATACAGTGCCAATCTAC<br>AAACAGTAGAAATTCAAGAGTATTCT<br>GTCTGAAAATCTACAAACAGTAGAAA                                                                                       | In vitro transcription of crRNA |
| T7 Mb3 Saraf 2tter R      | TTCCCTATAGTGAGTCGTATTAATTTTC<br>TCTAGGGGAATATATGGTTCGATGATCT<br>ACAAACAGTAGAAATTTCTGTGACTAT<br>GTGGGTACCACAATCTACAAACAGTA<br>GAAATTCAGGGTATATATAGACAACG<br>TTAATCTACAAACAGTAGAAATTCCT                       | In vitro transcription of crRNA |
| T7 Mb3 miR10b R           | ATAGTGAGTCGTATTAATTTTC<br>TGCTTCCCTTATGCCCGGCAGGAATCT<br>ACAAACAGTAGAAATTTGCTTCCCCTA<br>CGCCCGGCAAGAATCTACAAACAGTA<br>GAAATTAACGCTTTCGCCAATTTCCAC                                                           | In vitro transcription of crRNA |
| T7 Mb3 prps fam new R     | ACATCTACAAACAGTAGAAATTCCT<br>ATAGTGAGTCGTATTAATTTTC<br>ATTACAGAAATGTCAATCACATTATCT<br>ACAAACAGTAGAAATTAGAATGTGGC<br>AATCATGCATAATATCTACAAACAGT<br>AGAAATTGATGTACCAAGCATGTTTCC<br>TGTCCTATAGTGAGTCGTATTAATTT | In vitro transcription of crRNA |
| T7 Mb3 547 509 R          | C<br>TTCCTGCAGATGACGTCGGTCGCATCT<br>ACAAACAGTAGAAATTTGCAGGAAGT<br>AAAATGGCATATAATCTACAAACAGT<br>AGAAATTCCTATAGTGAGTCGTATTA                                                                                  | In vitro transcription of crRNA |
| T7 Mb3 Kcnj10 crRNA1 &3 R | ATTTTC<br>CTCCCTCGCACCAGCCCCTGTGAATCT<br>ACAAACAGTAGAAATTTGCGAGGGAG<br>GACCATGGGTGGAATCTACAAACAGT<br>AGAAATTCCTATAGTGAGTCGTATTA                                                                             | In vitro transcription of crRNA |
| T7 Mb3 Slit2 crRNA        | ATTTTC                                                                                                                                                                                                      | In vitro transcription of crRNA |
| Prps111 Ext F             | GGAAGGGACAGTAACGGCTTT<br>GATGCCATGAGTCAAGATGGCATAAA                                                                                                                                                         | Genotyping                      |
| Prps111 qPCR R            | CTC                                                                                                                                                                                                         | Genotyping                      |

|                     |                                                                 |                                      |
|---------------------|-----------------------------------------------------------------|--------------------------------------|
| Mrv1 ext R          | GTGGCTAACTTCTTTGAAC TG1GGTC<br>AC                               | Genotyping                           |
| Saraf ext F3        | CACGCTTTGTGTAGAACCATCAAATG                                      | Genotyping                           |
| Saraf ext R5        | TCTA<br>GCATCACTGCATGGGAGGCC                                    | Genotyping                           |
| miR10b ext F        | TTAAGAAGAAGAAGGTCCTGGCTGCT                                      | Genotyping                           |
| miR10b ext R        | CA<br>AATACCCTAAAACCTGGCTCTCTGGC                                | Genotyping                           |
| Prps1 ext F         | CTTCTAGTATACAGGTTCTTTAGGTG<br>CTCTTTCTCTA                       | Genotyping                           |
| Prps1 ext R         | GCTGTCCGTTACAATGCCATTCACAG<br>TA                                | Genotyping                           |
| Prps2 ext F2        | ACTCTGCTTTCCGATTAAGAGTGAAGT<br>GTG                              | Genotyping                           |
| Prps2 ext R2        | TTTGACTGCCTTTGAAACATACATTGC<br>CTG                              | Genotyping                           |
| miR201 ext F2       | GAGACTCTTAGTTTCTAGATCTGGTTC<br>CTT                              | Genotyping                           |
| miR547 ext R        | AAGAAGGACAGGGGTGGTAAAAGAG<br>AAGTA                              | Genotyping                           |
| miR509 ext F        | AGATTGTGGTCAGGACAGAGATAGAG<br>GAAA                              | Genotyping                           |
| miR509 ext R        | CACTGGTTGGGTGCAAATATCTACATC<br>TGA                              | Genotyping                           |
| Kcnj10 geno F       | TTCATGTTTGACTTATAGGACCTCACG<br>CTG                              | Genotyping                           |
| Kcnj10 geno R       | TCGTCCATAGATCCTTGAGGTAGAGG<br>AAAC                              | Genotyping                           |
| BamHI opti linker F | AAGAAGGGATCCAGCGGTTTCAGAGAC<br>CCCAGGA                          | pcDNA3.1-Mb3Cas12a-<br>mSA construct |
| mSA GBS R           | ACTGTGCTGGATATCTGCAGAATTCTC<br>ATTTAACTTTGGTGAAGGTGTCCTGAC<br>C | pcDNA3.1-Mb3Cas12a-<br>mSA construct |
| pUC F               | TGATGCGGTATTTTCTCCTTACGCATC<br>TG                               | pUC-Slit2-BamHI<br>plasmid construct |
| pUC R               | ACATGTGAGCAAAGGCCAGCAAAG<br>CTGGCCTTTTGTCTACATGTTAAGTAC         | pUC-Slit2-BamHI<br>plasmid construct |
| Slit2 up GBS F      | ATGTCACCTGGATAAAGTCTTGAGC<br>GGCTGGATCCAACTCACAGAACAAG          | pUC-Slit2-BamHI<br>plasmid construct |
| Slit2 up GBS R      | CCACTGACA<br>CTGTGAGTTTGGATCCAGCCCCTGTGA                        | pUC-Slit2-BamHI<br>plasmid construct |
| Slit2 down GBS F    | TAATTTTGATTGCCAGAATG<br>AAGGAGAAAATACCGCATCAAAGAAT              | pUC-Slit2-BamHI<br>plasmid construct |
| Slit2 down GBS R    | GTTCTTGAAATTGTGCTTAAAGGC<br>/5Biosg/TAAGTACATGTCACCTGGATAA      | PCR for Biotin donor<br>DNA          |
| Slit2 up bio F      | AGTCTTGAGC<br>/5Biosg/AAGAATGTTCCCTTGAAATTGTG                   | PCR for Biotin donor<br>DNA          |
| Slit2 down bio R    | CTTAAAGGC                                                       | DNA                                  |

|                   |                                                                                       |                     |
|-------------------|---------------------------------------------------------------------------------------|---------------------|
| Slit2 ext F       | CCA<br>CTTGGCTGAAGGAATCTGAAGATAGG                                                     | Genotyping          |
| Slit2 ext R       | ACTC                                                                                  | Genotyping          |
| U6 forward        | GAGGGCCTATTTCCCATGATTCCTT<br>ACCGAGCAGGAGTGAGGATCTACAAA<br>CAGTAGAAATTCGGTGTTTCGTCCTT | PCR for Dnmt1 crRNA |
| U6 Mb3 Dnmt1 17nt | CCAC<br>CACCGAGCAGGAGTGAGGATCTACAA<br>ACAGTAGAAATTCGGTGTTTCGTCCTT                     | PCR for Dnmt1 crRNA |
| U6 Mb3 Dnmt1 18nt | TCCAC<br>TCACCGAGCAGGAGTGAGGATCTACA<br>AACAGTAGAAATTCGGTGTTTCGTCCT                    | PCR for Dnmt1 crRNA |
| U6 Mb3 Dnmt1 19nt | TTCCAC<br>TTCACCGAGCAGGAGTGAGGATCTAC<br>AAACAGTAGAAATTCGGTGTTTCGTC                    | PCR for Dnmt1 crRNA |
| U6 Mb3 Dnmt1 20nt | TTTCCAC<br>ATTCACCGAGCAGGAGTGAGGATCTA<br>CAAACAGTAGAAATTCGGTGTTTCGTC                  | PCR for Dnmt1 crRNA |
| U6 Mb3 Dnmt1 21nt | CTTTCCAC<br>AATTCACCGAGCAGGAGTGAGGATCT<br>ACAAACAGTAGAAATTCGGTGTTTCGT                 | PCR for Dnmt1 crRNA |
| U6 Mb3 Dnmt1 22nt | CCTTTCCAC<br>AAATTCACCGAGCAGGAGTGAGGATC<br>TACAAACAGTAGAAATTCGGTGTTTCG                | PCR for Dnmt1 crRNA |
| U6 Mb3 Dnmt1 23nt | TCCTTTCCAC                                                                            | PCR for Dnmt1 crRNA |
| Dnmt1 F2          | CCGTTTTGGGCTCTGGGACTCA<br>AATCCAGAATGCACAAAGTACTGCAC                                  | Genotyping          |
| Dnmt1 R2          | A                                                                                     | Genotyping          |
